# Supplementary material
Source: Springer Nature journal article supplement (https://www.springermedizin.de/resource/supplementary/12889_2012_5369_MOESM2_ESM.pdf/9495232)
Supplement: MOESM2 [file 9495232]

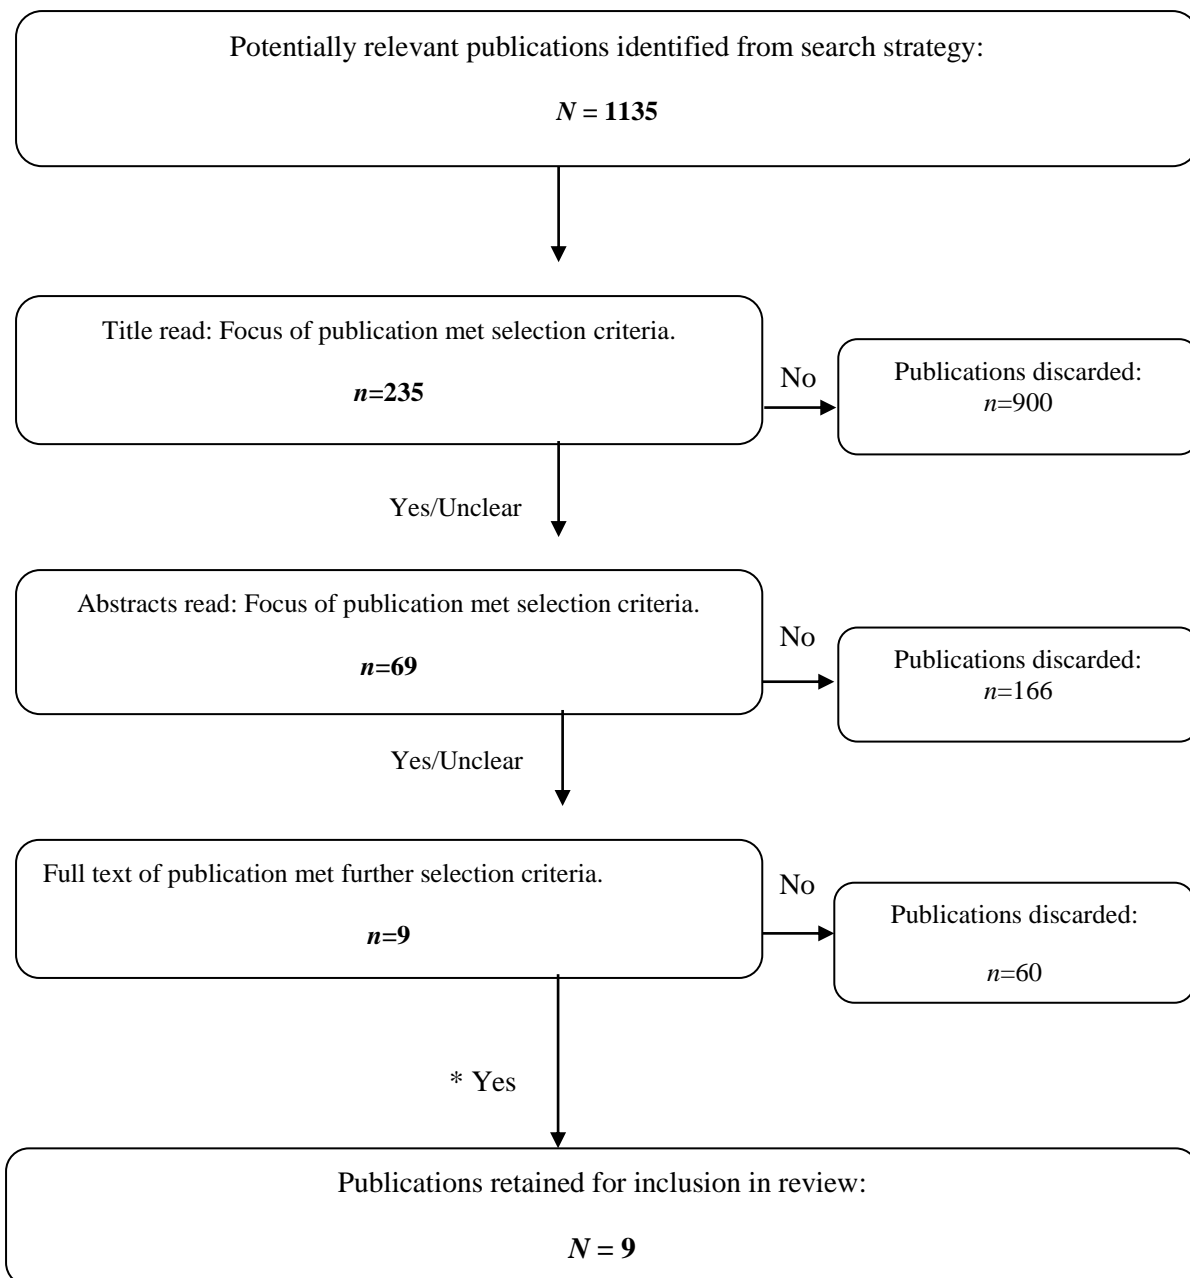

*Figure 2: Process of study selection*

\*the full-text version of each of the remaining articles was obtained and reviewed separately by two researchers.
